# Supplementary material for: 7-Hydroxycoumarin Induces Vasorelaxation in Animals with Essential Hypertension: Focus on Potassium Channels and Intracellular Ca2+ Mobilization
Source: MDPI journal article supplement (doi:10.3390/molecules27217324), 2022-10-28
Supplement: s1 [file s1]

# **7-hydroxycoumarin Induces Vasorelaxation in Animals with Essential Hypertension: Focus on Potassium Channels and Intracellular Ca<sup>2+</sup> Mobilization**

Rafael L. C. Jesus <sup>1</sup>, Isnar L.P. Silva <sup>1</sup>, Fênix A. Araújo <sup>2</sup>, Raiana A. Moraes <sup>2</sup>, Liliane B. Silva <sup>1</sup>,  
Daniele S. Brito <sup>1</sup>, Gabriela B.C. Lima <sup>1</sup>, Quiara L. Alves <sup>1</sup> and Darizy F. Silva <sup>1,2,\*</sup>

<sup>1</sup> Laboratory of Cardiovascular Physiology and Pharmacology, Federal University of Bahia, Salvador 40110-902, Brazil

<sup>2</sup> Gonçalo Moniz Institute, Oswaldo Cruz Foundation—FIOCRUZ, Salvador 40296-710, Brazil

\* Correspondence: darizy@gmail.com (D.F.S); Tel.: +55-719-88-52-34-36

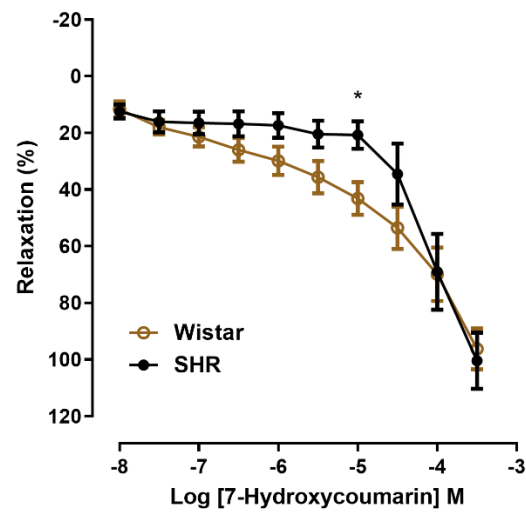

**Figure S1.** Vasorelaxation effects of 7-HC in the superior mesenteric artery from wistar and SHR rats. Results are expressed as mean  $\pm$  S.E.M. Statistical analysis was performed using unpaired Student's t-tests. \* $p < 0.05$  versus wistar.

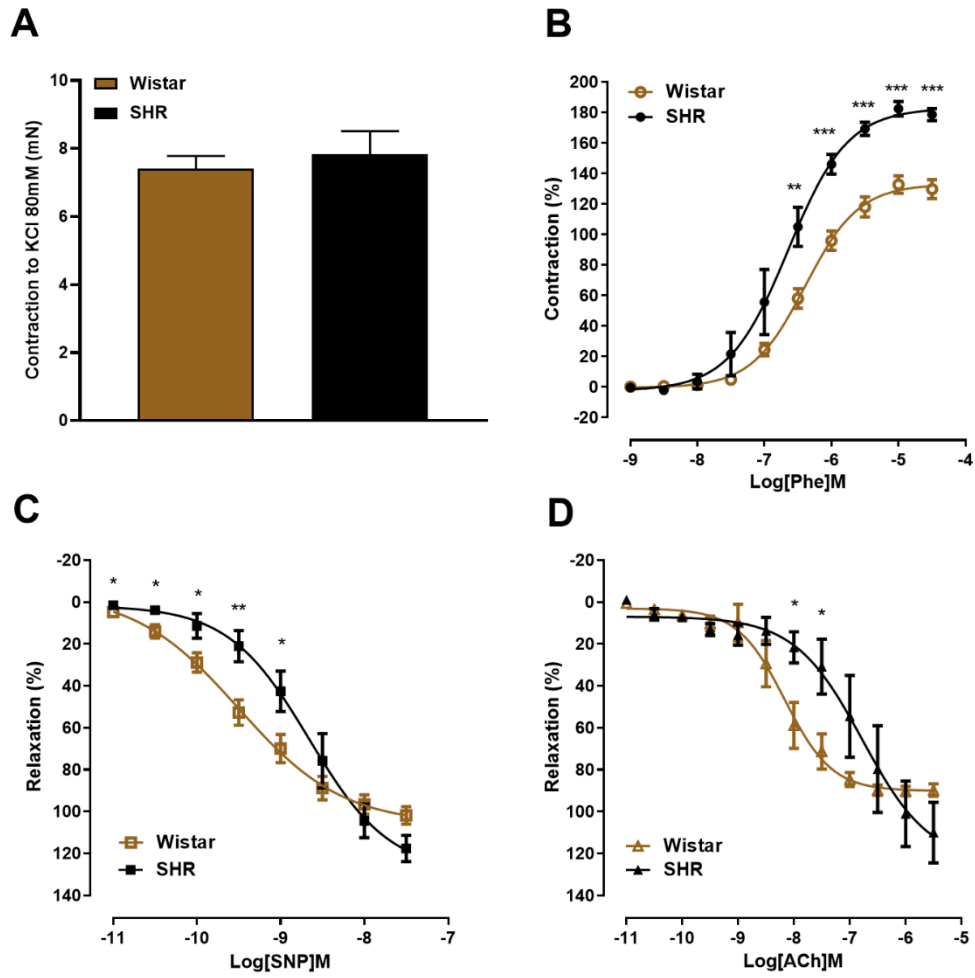

**Figure S2.** Vascular abnormalities in superior mesenteric artery from hypertensive compared to normotensive rats. **A)** Bar graphs showing contraction induced by Tyrode's solution containing KCl 80 mM. **B)** Contraction responses induced by Phe ( $10^{-9}$  to  $3 \times 10^{-5}$  M, cumulatively). **C)** Relaxation responses induced by SNP ( $10^{-11}$  to  $3 \times 10^{-8}$  M, cumulatively). **D)** Relaxation responses induced by Ach ( $10^{-11}$  to  $3 \times 10^{-6}$  M, cumulatively). Results are expressed as mean  $\pm$  S.E.M. Statistical analysis was performed using unpaired Student's t-tests. \* $p < 0.05$ , \*\* $p < 0.01$  or \*\*\* $p < 0.001$  versus wistar.
